# Supplementary material
Source: PubMed Central journal article supplement (PMC7666536)
Supplement: mmc1.pdf [file mmc1.pdf]

**Cell, Volume 184**

**Supplemental Information**

**Cryo-EM Structure of an Extended SARS-CoV-2**

**Replication and Transcription Complex**

**Reveals an Intermediate State in Cap Synthesis**

**Liming Yan, Ji Ge, Litao Zheng, Ying Zhang, Yan Gao, Tao Wang, Yucen Huang, Yunxiang Yang, Shan Gao, Mingyu Li, Zhenyu Liu, Haofeng Wang, Yingjian Li, Yu Chen, Luke W. Guddat, Quan Wang, Zihe Rao, and Zhiyong Lou**

## Supplementary Tables

**Table S1. Cryo-EM data statistics (Related to Figure 1).**

|                                                     | cap(-1)'-RTC |
|-----------------------------------------------------|--------------|
| <b>Data collection and processing</b>               |              |
| Magnification                                       | 165,000      |
| Voltage (kV)                                        | 300          |
| Electron exposure (e <sup>-</sup> /Å <sup>2</sup> ) | 60           |
| Defocus range (μm)                                  | -1.0 to -1.8 |
| Pixel size (Å)                                      | 0.82         |
| Symmetry imposed                                    | C1           |
| Initial particle images (no.)                       | 529,558      |
| Final particle images (no.)                         | 67,540       |
| Map resolution (Å)                                  | 2.83         |
| FSC threshold                                       |              |
| Map resolution range (Å)                            | 2.0 - 9.0    |
| <b>Refinement</b>                                   |              |
| Model resolution (Å)                                | 2.8          |
| FSC threshold                                       | 0.143        |
| Model resolution range (Å)                          | ∞ to 2.8     |
| Map sharpening <i>B</i> factor (Å <sup>2</sup> )    | -67.7        |
| Model composition                                   |              |
| Non-hydrogen atoms                                  | 21,831       |
| Protein residues                                    | 2654         |
| Ligands                                             | 52           |
| <i>B</i> factors (Å <sup>2</sup> )                  |              |
| Protein                                             | 51.7         |
| Ligand                                              | 73.4         |
| R.m.s. deviations                                   |              |
| Bond lengths (Å)                                    | 0.012        |
| Bond angles (°)                                     | 0.87         |
| Validation                                          |              |
| MolProbity score                                    | 3.13         |
| Clashscore                                          | 18.7         |
| Poor rotamers (%)                                   | 0.07         |
| Ramachandran plot                                   |              |
| Favored (%)                                         | 91.2         |
| Allowed (%)                                         | 8.8          |
| Disallowed (%)                                      | 0            |

**Table S2. Interactions of nsp9 with nsp12 and GDP (Related to Figure 3).**

| Molecule | Residue | Molecule | Residue                               |
|----------|---------|----------|---------------------------------------|
| nsp9     | N1      | nsp12    | F35, D36, I37, Y38, N39, D208         |
|          | N2      |          | D36, I37, Y38, V204, T206, D221, R733 |
|          | E3      |          | Y38, N39, D40                         |
|          | L4      |          | I223                                  |
|          | R74     |          | T226                                  |
|          | N96     |          | V231, P232, V233, Y289, D291          |
|          | L97     |          | V233, R733                            |
|          | G100    |          | V202                                  |
|          | L103    |          | I223, V231                            |
|          | G104    |          | I223                                  |
|          | A107    |          | Q224                                  |
|          | N1      | GDP      | $\alpha$ -PO <sub>3</sub>             |

**Table S3. Interactions of nsp13-2 with nsp8-1 and nsp12 (Related to Figure 5).**

| Molecule | Residue | Molecule         | Residue       |
|----------|---------|------------------|---------------|
| nsp13-2  | S44     | nsp8-1           | M70           |
|          | V45     |                  | Q73           |
|          | P53     |                  | Y71, R75      |
|          | D56     |                  | T96           |
|          | L65     |                  | M62           |
|          | G67     |                  | M62           |
|          | M68     |                  | Q65           |
|          | I79     |                  | K58, L59, M62 |
|          | S80     |                  | L59           |
|          | L92     |                  | M67, M70, Y71 |
|          | Y93     |                  | nsp12         |
|          | N95     | Y903, S904, V905 |               |
|          | T96     | M902, Y903, S904 |               |

**Table S4. Interactions of nsp13-2 and nsp13-1 (Related to Figure 5).**

| <b>Molecule</b> | <b>Residue</b> | <b>Molecule</b> | <b>Residue</b> |
|-----------------|----------------|-----------------|----------------|
| nsp13-2         | R155           | nsp13-1         | Y253           |
|                 | E156           |                 | Y253, P254     |
|                 | V169           |                 | E244, Y246     |
